# Supplementary material for: Promoting Bifunctional Oxygen Catalyst Activity of Double-Perovskite-Type Cubic Nanocrystallites for Aqueous and Quasi-Solid-State Rechargeable Zinc-Air Batteries
Source: MDPI journal article supplement (doi:10.3390/catal13101332), 2023-09-29
Supplement: s1 [file s1]

## Supplementary Material

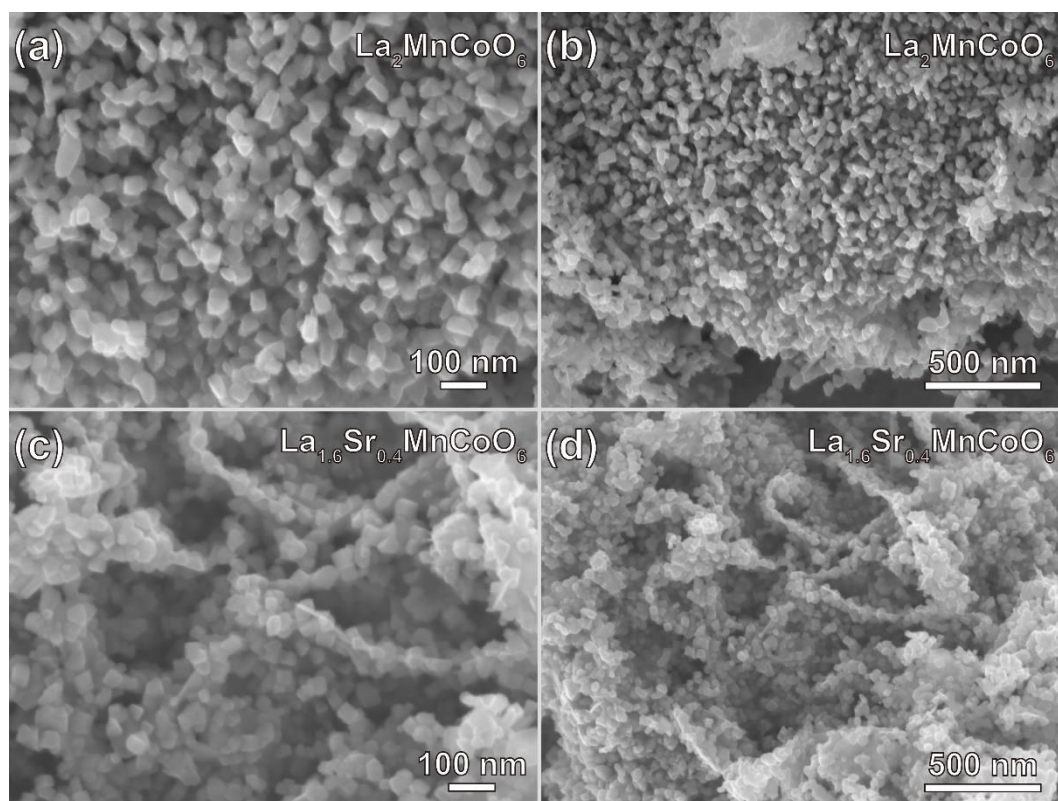

**Figure S1.** SEM images of (a), (b)  $\text{La}_2\text{MnCoO}_6$  and (c), (d)  $\text{La}_{1.6}\text{Sr}_{0.4}\text{MnCoO}_6$  nanocrystallites.

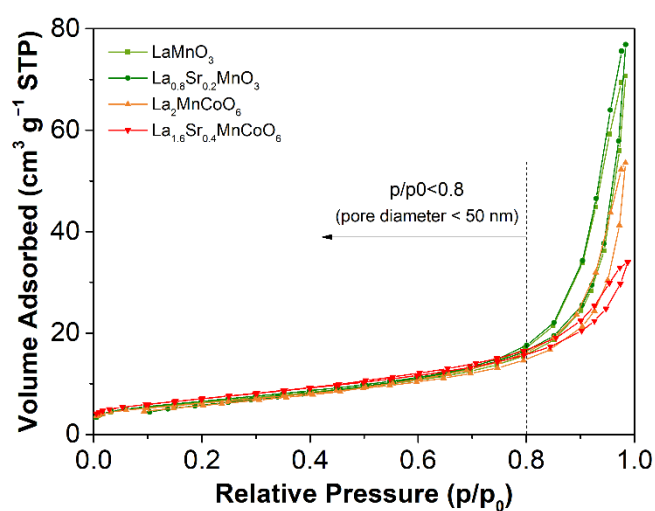

**Figure S2.**  $\text{N}_2$  adsorption-desorption isotherms of the perovskite-type nanocrystallites.

**Table S1.** Physical parameters for the perovskite-type nanocrystallites.

| Sample                                         | $a_{\text{BET}}$<br>$\text{m}^2 \text{g}^{-1}$ | $V_{\text{total}}^*$<br>$\text{cm}^3 \text{g}^{-1}$ |
|------------------------------------------------|------------------------------------------------|-----------------------------------------------------|
| $\text{LaMnO}_3$                               | 22.8                                           | 0.024                                               |
| $\text{La}_{0.8}\text{Sr}_{0.2}\text{MnO}_3$   | 23.7                                           | 0.025                                               |
| $\text{La}_2\text{MnCoO}_6$                    | 22.1                                           | 0.023                                               |
| $\text{La}_{1.6}\text{Sr}_{0.4}\text{MnCoO}_6$ | 25.2                                           | 0.024                                               |

\* $p/p^0=0.8$ , corresponding to total pore volume of micro- and meso-pores with diameter <50 nm.

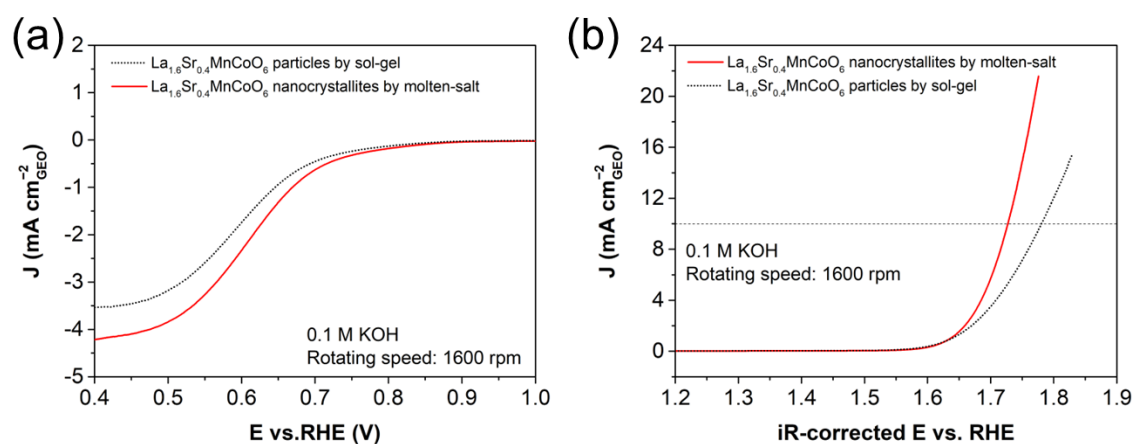**Figure S3.** Comparison of (a) ORR and (b) OER polarization curves of  $\text{La}_{1.6}\text{Sr}_{0.4}\text{MnCoO}_6$  nanocrystallites synthesized via a molten-salt method and  $\text{La}_{1.6}\text{Sr}_{0.4}\text{MnCoO}_6$  particle synthesized via a sol-gel method.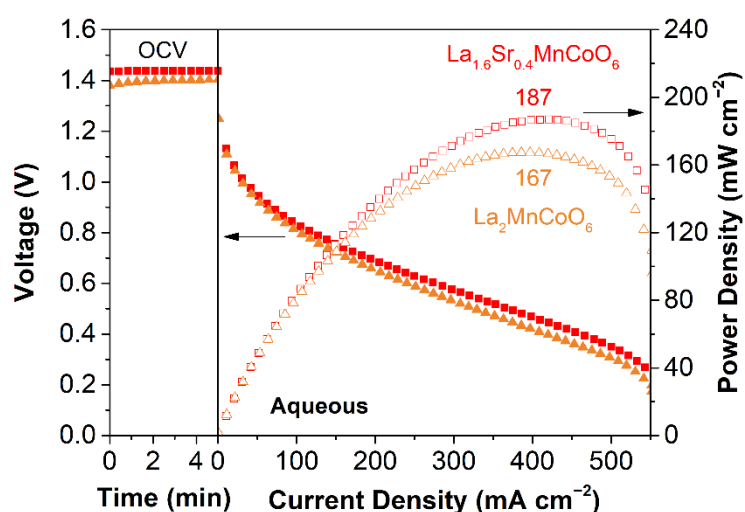**Figure S4.** Comparison of OCV, I-V and I-P profiles with PPD annotated in the image for aqueous Zn-air batteries with  $\text{La}_2\text{MnCoO}_6$  or  $\text{La}_{1.6}\text{Sr}_{0.4}\text{MnCoO}_6$  as the catalyst.

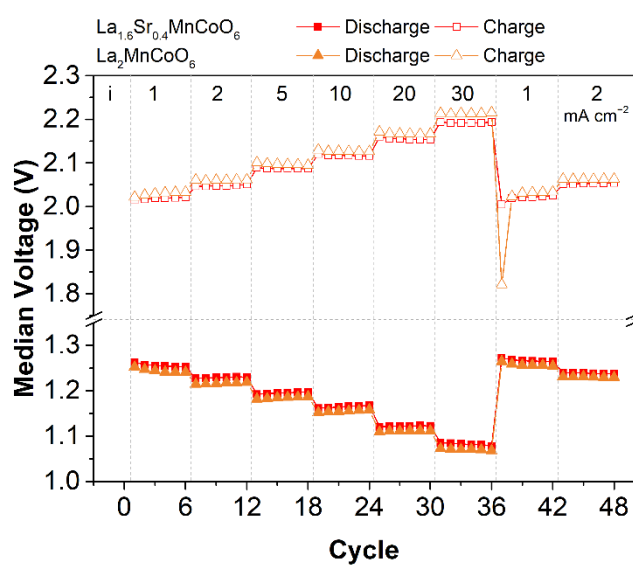

**Figure S5.** Comparison of rate performance for aqueous Zn-air batteries with  $\text{La}_2\text{MnCoO}_6$  or  $\text{La}_{1.6}\text{Sr}_{0.4}\text{MnCoO}_6$  as air cathode with 10-minute galvanostatic charging-discharging cycles.

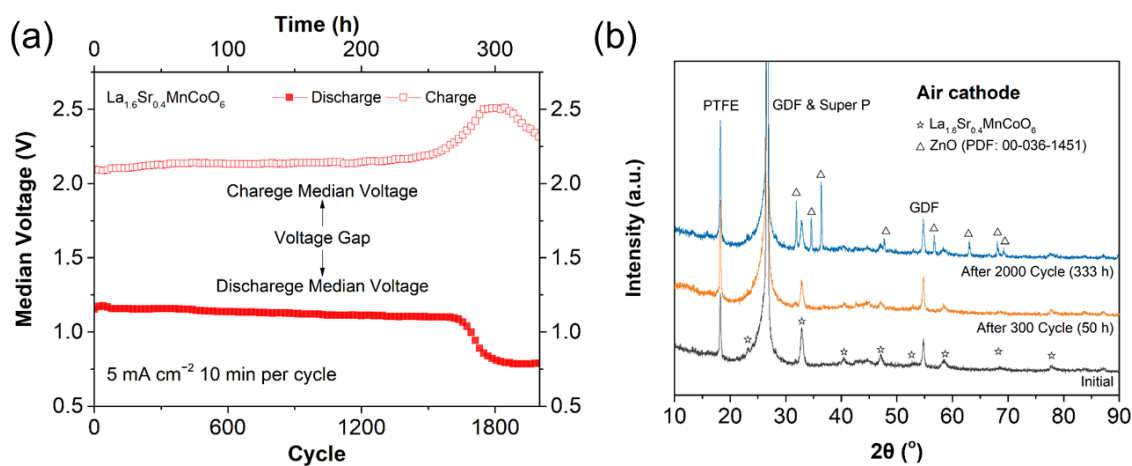

**Figure S6.** (a) A prolonged 2000-cycle (~333 h) test until build-up of overpotential of aqueous Zn-air battery with a  $\text{La}_{1.6}\text{Sr}_{0.4}\text{MnCoO}_6$  as air cathode; (b) XRD profiles of the initial  $\text{La}_{1.6}\text{Sr}_{0.4}\text{MnCoO}_6$  as air cathode and after 50 h and 333 h.

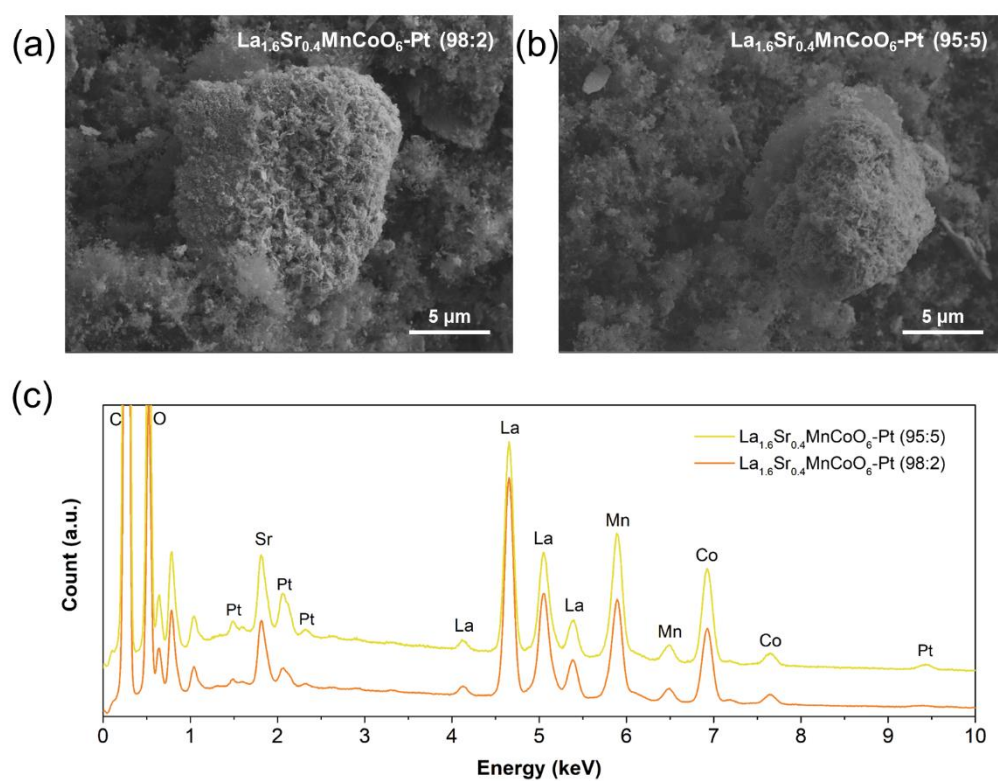

**Figure S7.** SEM images of (a)  $\text{La}_{1.6}\text{Sr}_{0.4}\text{MnCoO}_6\text{-Pt}$  (98:2) and (b)  $\text{La}_{1.6}\text{Sr}_{0.4}\text{MnCoO}_6\text{-Pt}$  (95:5) and (c) EDS profiles.

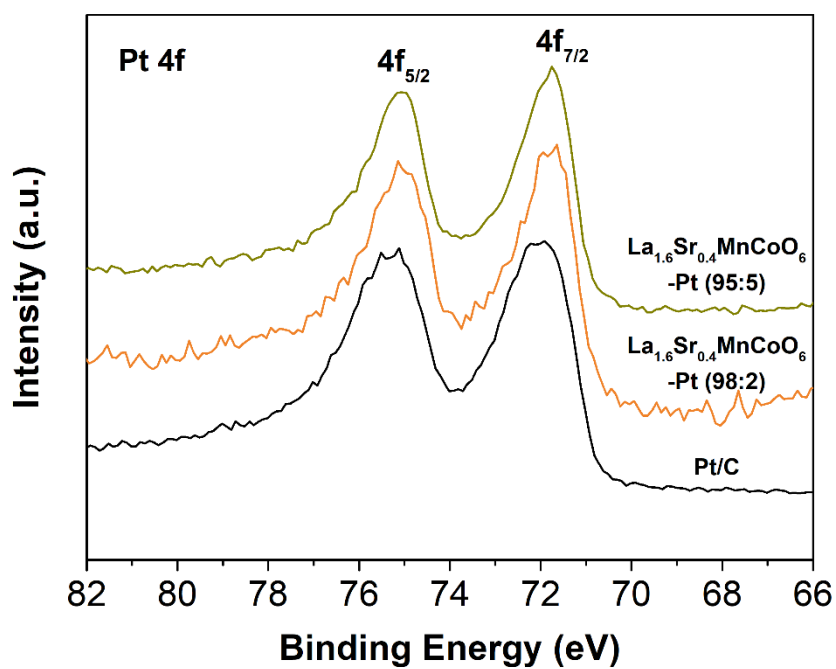

**Figure S8.** XPS Pt 4f spectra of Pt/C,  $\text{La}_{1.6}\text{Sr}_{0.4}\text{MnCoO}_6\text{-Pt}$  (98:2) and  $\text{La}_{1.6}\text{Sr}_{0.4}\text{MnCoO}_6\text{-Pt}$  (95:5).

**Table S2.** Comparison of physical parameters of some representative catalysts and performances of aqueous Zn–air batteries.

| Catagogy                                                  | Catalyst                                                                                                                        | ORR<br>$E_{1/2}$ | OER<br>$E_{j=10}$ | $\Delta E$<br>$E_{1/2}-E_{j=10}$ | Zn-air<br>Batteries<br>Electrolyte                   | Cata-<br>lyst<br>loading | OCV        | PPD             | $\Delta E$<br>$V_D-V_C$           | Durability                                  | [Ref.]       |
|-----------------------------------------------------------|---------------------------------------------------------------------------------------------------------------------------------|------------------|-------------------|----------------------------------|------------------------------------------------------|--------------------------|------------|-----------------|-----------------------------------|---------------------------------------------|--------------|
|                                                           |                                                                                                                                 | $V_{RHE}$        | $V_{RHE}$         | $V_{RHE}$                        |                                                      | mg<br>$cm^{-2}$          | $V_{Cell}$ | mW<br>$cm^{-2}$ | $V_{Cell}$<br>@mA<br>$cm^{-2}$    | Cycles, h<br>@mA $cm^{-2}$                  |              |
| Perovskite                                                | <b>La<sub>1.6</sub>Sr<sub>0.4</sub>MnCoO<sub>6</sub> nanocrystallites</b>                                                       | <b>0.61</b>      | 1.71              | 1.10                             | 6 M KOH +<br>0.2 M Zn(Ac) <sub>2</sub>               | 1                        | 1.44       | 187             | 0.75@1<br>0.90@5<br>1.10@30       | 1500, 250h<br>@5                            | This<br>work |
| Precious<br>metal                                         | Pt/C and IrO <sub>2</sub><br>(1:1)                                                                                              | 0.84             | 1.72              | 0.88                             | 6 M KOH +<br>0.2 M Zn(Ac) <sub>2</sub>               | 1                        | 1.46       | 217             | 0.62@1<br>0.81@5<br>1.16@30       | <60, <10h<br>@5                             | This<br>work |
| Perovskite<br>and small<br>amount of<br>precious<br>metal | La <sub>1.6</sub> Sr <sub>0.4</sub> MnCoO <sub>6</sub><br>and Pt/C (98:2)                                                       | 0.79             | 1.70              | 0.91                             | 6 M KOH +<br>0.2 M Zn(Ac) <sub>2</sub>               | 1                        | 1.43       | N/A             | 0.88@5                            | N/A                                         | This<br>work |
|                                                           | La <sub>1.6</sub> Sr <sub>0.4</sub> MnCoO <sub>6</sub><br>and Pt/C (95:5)                                                       | 0.81             | 1.66              | 0.85                             | 6 M KOH +<br>0.2 M Zn(Ac) <sub>2</sub>               | 1                        | 1.44       | N/A             | 0.85@5                            | N/A                                         | This<br>work |
| Perovskite                                                | PrBa <sub>0.5</sub> Sr <sub>0.5</sub> Co <sub>1.5</sub> Fe <sub>0.5</sub> O <sub>6</sub><br>+ $\delta$<br>mesoporous nano fiber | 0.73             | 1.53              | 0.80                             | 6 M KOH +<br>0.2 M Zn(Ac) <sub>2</sub>               | N/A                      | N/A        | 127             | ~0.9@10                           | 150, N/A<br>@10                             | [25]         |
| Perovskite                                                | Mesoporous<br>La <sub>0.6</sub> Ca <sub>0.4</sub> CoO <sub>3</sub>                                                              | N/A              | N/A               | N/A                              | 4 M KOH +<br>saturated ZnO<br>(O <sub>2</sub> -feed) | N/A                      | N/A        | N/A             | 0.86@20<br>(O <sub>2</sub> -feed) | 1000, 166h<br>@20<br>(O <sub>2</sub> -feed) | [3]          |
| Perovskite                                                | La <sub>0.8</sub> Sr <sub>0.2</sub> Co <sub>0.4</sub> Mn <sub>0.6</sub> O <sub>3</sub>                                          | 0.69             | 1.74              | 1.03                             | 6 M KOH +<br>0.2 M Zn(Ac) <sub>2</sub>               | 5                        | N/A        | ~160            | 0.55@10                           | 100, 17h<br>@10                             | [19]         |
| Perovskite                                                | La <sub>0.9</sub> Y <sub>0.9</sub> MnO <sub>3</sub>                                                                             | 0.75             | N/A               | N/A                              | 6 M KOH +<br>0.2 M Zn(Ac) <sub>2</sub>               | 8                        | N/A        | 167             | ~0.8@10                           | 30, 5h<br>@10                               | [56]         |
| Perovskite<br>and simple<br>metal oxide                   | Co <sub>3</sub> O <sub>4</sub> -decorated<br>La <sub>0.5</sub> Sr <sub>0.5</sub> MnO <sub>3</sub>                               | ~0.72            | 1.70              | ~0.98                            | 6 M KOH +<br>0.2 M Zn(Ac) <sub>2</sub>               | 1                        | 1.44       | 147             | ~0.7@1<br>~0.9@4                  | 45, 7.5h<br>@2                              | [57]         |
| Perovskite<br>and precious<br>metal                       | Sr(Co <sub>0.8</sub> Fe <sub>0.2</sub> ) <sub>0.95</sub> Po <sub>0.05</sub> O <sub>3</sub><br>- $\delta$<br>and Pt/C (2:1)      | 0.81             | 1.60              | 0.79                             | 6 M KOH +<br>0.2 M ZnCl <sub>2</sub>                 | 2                        | ~1.4       | 122             | 0.77@5                            | 240, 80h<br>@5                              | [24]         |

Note: the [Ref.] numbers are same to those presented in the Reference list in the main text.

**Disclaimer/Publisher's Note:** The statements, opinions and data contained in all publications are solely those of the individual author(s) and contributor(s) and not of MDPI and/or the editor(s). MDPI and/or the editor(s) disclaim responsibility for any injury to people or property resulting from any ideas, methods, instructions or products referred to in the content.
